# Supplementary material for: Moderators of ayahuasca’s biological antidepressant action
Source: PubMed Central journal article supplement (PMC9760741; doi:10.3389/fpsyt.2022.1033816), 2022-12-05
Supplement: Image_1.pdf [file Image_1.pdf]

## Biological Moderators of Ayahuasca's Antidepressant Action

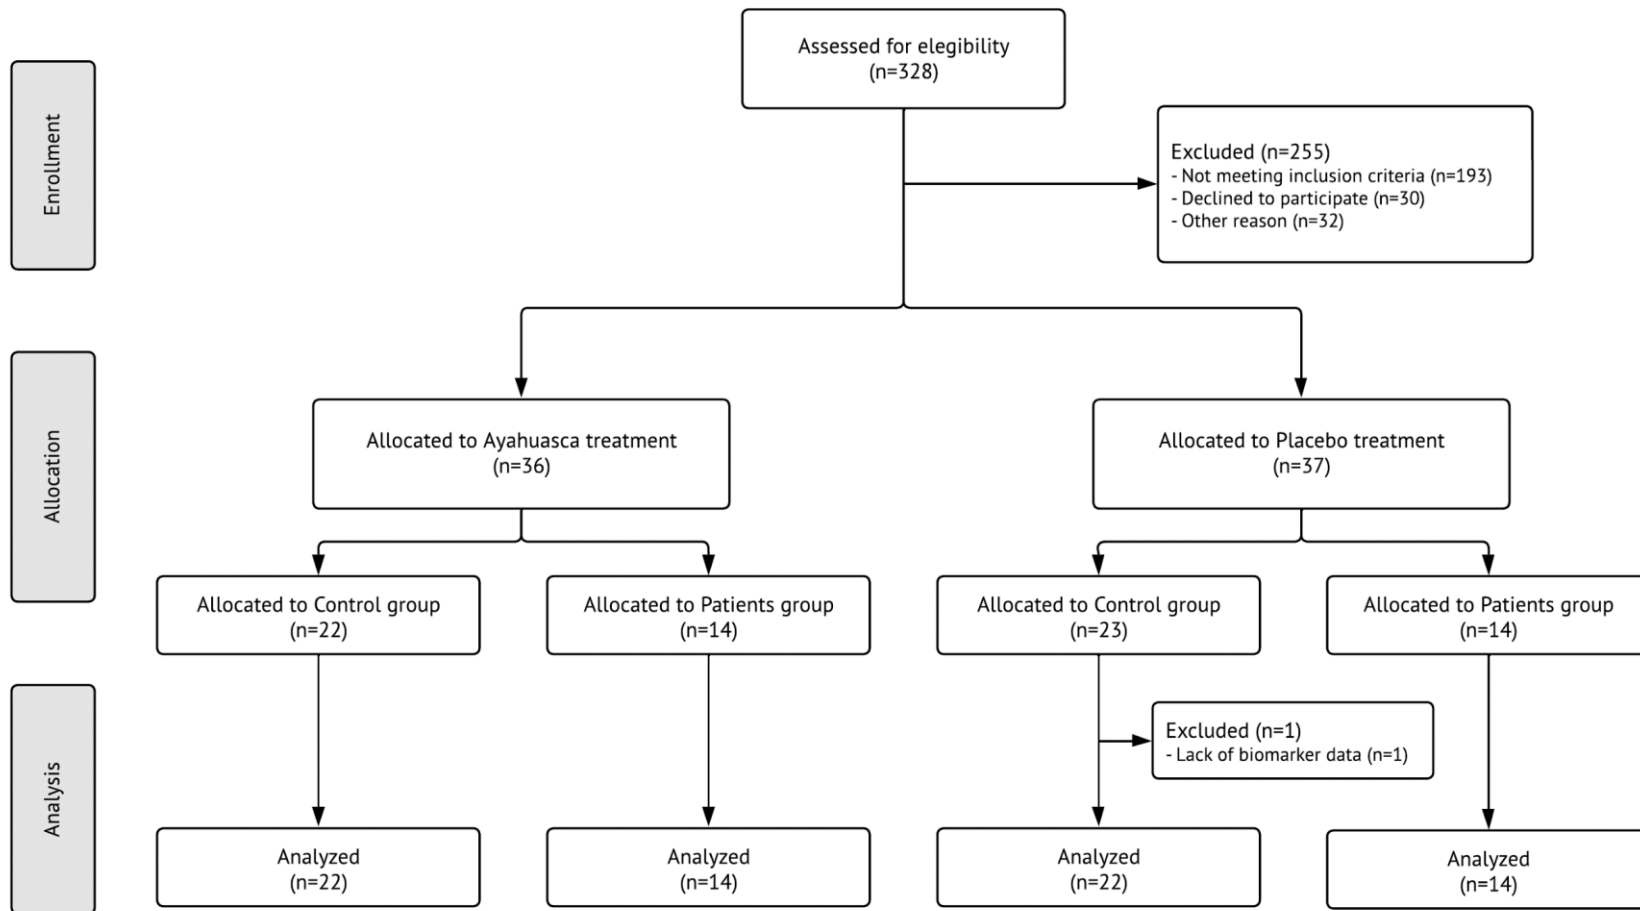

**Figure S1.** The consolidated standards of clinical trial reports (CONSORT) for control group (C) and treatment-resistant depressive patients (P) allocated to either an ayahuasca or a placebo treatment in a double-blind placebo control clinical trial.
