# Supplementary material for: Moderators of ayahuasca’s biological antidepressant action
Source: PubMed Central journal article supplement (PMC9760741; doi:10.3389/fpsyt.2022.1033816), 2022-12-05
Supplement: Table_1.pdf [file Table_1.pdf]

## Biological Moderators of Ayahuasca's Antidepressant Action

**Table S1.** Sociodemographic and clinical characteristics of the sample.

|                           |                      | Ayahuasca group |             | Placebo group |             |
|---------------------------|----------------------|-----------------|-------------|---------------|-------------|
|                           |                      | Control         | Patients    | Control       | Patients    |
| <b>Participants</b>       | <i>n</i>             | 22              | 14          | 22            | 14          |
| <b>Sex</b>                | <i>Women</i>         | 12 (54.5%)      | 11 (78.6%)  | 13 (59.1%)    | 10 (71.4%)  |
|                           | <i>Men</i>           | 10 (45.5%)      | 3 (21.4%)   | 9 (40.9%)     | 4 (28.6%)   |
| <b>Age (years)</b>        | <i>Mean (SD)</i>     | 31.0 (8.8)      | 39.9 (11.4) | 30.6 (10.4)   | 43.3 (12.0) |
| <b>Education</b>          | <i>Undergraduate</i> | 9 (40.9%)       | 11 (78.6%)  | 17 (77.3%)    | 12 (85.7%)  |
|                           | <i>Graduated</i>     | 13 (59.1%)      | 3 (21.4%)   | 5 (22.7%)     | 2 (14.3%)   |
| <b>Income</b>             | <i>Low</i>           | 8 (36.4%)       | 10 (71.4%)  | 13 (59.1%)    | 12 (85.7%)  |
|                           | <i>High</i>          | 14 (63.6%)      | 4 (28.6%)   | 9 (40.9%)     | 2 (14.3%)   |
| <b>HAM-D</b>              | <i>Mean (SD)</i>     | 0.29 (0.63)     | 24.1 (5.34) | 0.77 (1.15)   | 19.1 (3.95) |
| <b>MADRS</b>              | <i>Mean (SD)</i>     | 0.19 (0.50)     | 36.1 (6.13) | 0.68 (1.29)   | 29.2 (4.42) |
| <b>Years of disease</b>   | <i>Average</i>       | -               | 8.79 (6.25) | -             | 12.6 (12.2) |
| <b>Number of episodes</b> | <i>Average</i>       | -               | 2.71 (1.33) | -             | 3.43 (1.79) |

HAM-D= Hamilton Depression Rating Scale for Depression; MADRS= Montgomery-Asberg Depression Rating Scale.
