# Supplementary material for: Moderators of ayahuasca’s biological antidepressant action
Source: PubMed Central journal article supplement (PMC9760741; doi:10.3389/fpsyt.2022.1033816), 2022-12-05
Supplement: Table_2.pdf [file Table_2.pdf]

## Biological Moderators of Ayahuasca's Antidepressant Action

**Table S2.** Statistical values of interaction ( $\beta$ ) and  $R^2$  of moderation analyses of acute physiological (AUC= Area Under the Curve of salivary cortisol), cognitive (HRS= Hallucinogenic Rating Scale) and emotional outcomes ( $\Delta$ MADRS<sub>D0-2h40</sub> = changes in MADRS from D0 to 2h40 of the dosing session) during ayahuasca experimental session on serum Brain-derived Neurotrophic Factor (BDNF), serum cortisol (SC), salivary cortisol awakening response (CAR), plasma C-Reactive protein (CRP) and serum interleukin 6 (IL-6), two days after treatment (D2) on treatment-resistant depressive patients and healthy control groups.

|                                          | BDNF          |       | SC                  |             | CAR            |       | CRP             |       | IL-6            |       |
|------------------------------------------|---------------|-------|---------------------|-------------|----------------|-------|-----------------|-------|-----------------|-------|
|                                          | $\beta$       | $R^2$ | $\beta$             | $R^2$       | $\beta$        | $R^2$ | $\beta$         | $R^2$ | $\beta$         | $R^2$ |
| Group*AUC                                | -.099         | .054  | -.115               | .007        | .734           | .245  | 1.115           | .168  | 1.395           | .707  |
|                                          | (-.558, .360) |       | (-.818, .589)       |             | (-.232, 1.700) |       | (-7.390, 5.161) |       | (-2.095, 4.885) |       |
| Group* $\Delta$ MADRS <sub>D0-2h40</sub> | -.004         | .145  | <b>.026</b>         | <b>.280</b> | -.006          | .013  | .067            | .235  | -.041           | .727  |
|                                          | (-.023, .014) |       | <b>(.000, .052)</b> |             | (-.054, .041)  |       | (-.192, .325)   |       | (-.186, .103)   |       |
| Group*HRS                                | -.012         | .031  | -.021               | .036        | .017           | .013  | .173            | .176  | .233            | .726  |
|                                          | (-.051, .026) |       | (-.079, .037)       |             | (-.075, .109)  |       | (-1.329, 2.01)  |       | (-.048, .514)   |       |

Bold values stand for significant interactions. Values inside brackets represents the 95% confidence interval for the estimate ( $\beta$ ). SC<sub>ES</sub>= salivary cortisol collected during the experimental session,  $\Delta$ MADRS<sub>D0-2h40</sub>= changes in Montgomery-Åsberg Depression Rating Scale (MADRS) from 4h before the experimental session (D0) until 2h40 of experimental session;  $\Delta$ MADRS<sub>ES-2h40</sub>= changes in MADRS from baseline until the 2h40 of experimental session; HRS= Hallucinogenic Rating Scale.
