# Supplementary material for: Moderators of ayahuasca’s biological antidepressant action
Source: PubMed Central journal article supplement (PMC9760741; doi:10.3389/fpsyt.2022.1033816), 2022-12-05
Supplement: Table_3.pdf [file Table_3.pdf]

## Biological Moderators of Ayahuasca's Antidepressant Action

**Table S3.** Placebo experimental session: Statistical values of interaction ( $\beta$ ) and  $R^2$  of moderation analyses of acute physiological (AUC= Area Under the Curve of salivary cortisol), cognitive (HRS= Hallucinogenic Rating Scale) and emotional outcomes ( $\Delta$ MADRS<sub>D0-2h40</sub> = changes in MADRS from D0 to 2h40 of the dosing session) during placebo experimental session on serum Brain-derived Neurotrophic Factor (BDNF), serum cortisol (SC), salivary cortisol awakening response (CAR), plasma C-Reactive protein (CRP) and serum interleukin 6 (IL-6), two days after placebo intake (D2) on treatment-resistant depressive patients and healthy control groups.

|                                          | <b>BDNF</b>   |       | <b>SC</b>     |       | <b>CAR</b>    |       | <b>CRP</b>     |       | <b>IL-6</b>    |       |
|------------------------------------------|---------------|-------|---------------|-------|---------------|-------|----------------|-------|----------------|-------|
|                                          | $\beta$       | $R^2$ | $\beta$       | $R^2$ | $\beta$       | $R^2$ | $\beta$        | $R^2$ | $\beta$        | $R^2$ |
| Group*AUC                                | .000          | .059  | .000          | .042  | .001          | .313  | -.008          | .240  | .009           | .123  |
|                                          | (-.002, .001) |       | (-.003, .002) |       | (-.001, .004) |       | (-.031, .016)  |       | (-.011, .029)  |       |
| Group* $\Delta$ MADRS <sub>D0-2h40</sub> | -.035         | .133  | .006          | .070  | .009          | .225  | -.051          | .202  | .390           | .091  |
|                                          | (-.077, .007) |       | (-.058, .070) |       | (-.078, .096) |       | (-.752, .651)  |       | (-.204, .983)  |       |
| Group*HRS                                | .051          | .253  | -.116         | .183  | -.176         | .285  | -.051          | .489  | .455           | .019  |
|                                          | (-.036, .139) |       | (-.248, .017) |       | (-.363, .010) |       | (-2.283, .220) |       | (-.920, 1.829) |       |

Bold values stand for significant interactions. Values inside brackets represents the 95% confidence interval for the estimate ( $\beta$ ). SC<sub>ES</sub>= salivary cortisol collected during the experimental session,  $\Delta$ MADRS<sub>D0-2h40</sub>= changes in Montgomery-Åsberg Depression Rating Scale (MADRS) from 4h before the experimental session (D0) until 2h40 of experimental session;  $\Delta$ MADRS<sub>ES-2h40</sub>= changes in MADRS from baseline until the 2h40 of experimental session; HRS= Hallucinogenic Rating Scale.
