# Supplementary material for: Moderators of ayahuasca’s biological antidepressant action
Source: PubMed Central journal article supplement (PMC9760741; doi:10.3389/fpsyt.2022.1033816), 2022-12-05
Supplement: Table_4.pdf [file Table_4.pdf]

## Biological Moderators of Ayahuasca's Antidepressant Action

**Table S4.** Statistical values of interaction ( $\beta$ ) and  $R^2$  of moderation analyses of acute physiological, (AUC= Area Under the Curve of salivary cortisol), cognitive (HRS= Hallucinogenic Rating Scale) and emotional outcomes ( $\Delta\text{MADRS}_{\text{D0-2h40}}$  = changes in MADRS from D0 to 2h40 of the dosing session) during ayahuasca experimental session on serum Brain-derived Neurotrophic Factor (BDNF), serum cortisol (SC), salivary cortisol awakening response (CAR), plasma C-Reactive protein (CRP) and serum interleukin 6 (IL-6), two days after treatment (D2) on clinical response ( $\text{MADRS}_{\text{D0}} - \text{MADRS}_{\text{D2}}$ ) of patients with treatment-resistant depression.

|                                                 | BDNF                  |             | SC            |       | CAR           |       | CRP            |       | IL-6          |       |
|-------------------------------------------------|-----------------------|-------------|---------------|-------|---------------|-------|----------------|-------|---------------|-------|
|                                                 | $\beta$               | $R^2$       | $\beta$       | $R^2$ | $\beta$       | $R^2$ | $\beta$        | $R^2$ | $\beta$       | $R^2$ |
| Response*AUC                                    | <b>-.060</b>          | <b>.511</b> | -.022         | .272  | .082          | .333  | -.429          | .201  | -.153         | .032  |
|                                                 | <b>(-.116, -.004)</b> |             | (-.105, .061) |       | (-.096, .259) |       | (-1.398, .539) |       | (-.854, .547) |       |
| Response* $\Delta\text{MADRS}_{\text{D0-2h40}}$ | .000                  | .341        | .000          | .272  | .001          | .105  | -.005          | .174  | -.002         | .215  |
|                                                 | (-.001, .000)         |             | (-.001, .001) |       | (-.001, .004) |       | (-.018, .009)  |       | (-.010, .007) |       |
| Response*HRS                                    | .007                  | .38         | .005          | .163  | .018          | .139  | -.048          | .164  | .027          | .102  |
|                                                 | (-.004, .018)         |             | (-.009, .020) |       | (-.017, .054) |       | (-.222, .126)  |       | (-.091, .146) |       |

Bold values stand for significant interactions. Values inside brackets represents the 95% confidence interval for the estimate ( $\beta$ ). SC dosing session= salivary cortisol collected during the experimental session,  $\Delta\text{MADRS}_{\text{D0-2h40}}$ = changes in Montgomery-Åsberg Depression Rating Scale (MADRS) from baseline (D0) until 2h40 of experimental session; HRS= Hallucinogenic Rating Scale.
